# Supplementary material for: Development and validation of a dementia screening tool for primary care in Taiwan: Brain Health Test
Source: PLOS journal article supplement (doi:10.1371/journal.pone.0196214), 2018-04-25
Supplement: S1 (10.1371/journal.pone.0196214.s001) [file journal.pone.0196214.s001]

### Brain Health Test: Risk Factors

|                                                   |                               |                                 |
|---------------------------------------------------|-------------------------------|---------------------------------|
| Name                                              | <hr/>                         |                                 |
| Birthday                                          | <hr/>                         |                                 |
| Performed Date                                    | <hr/>                         |                                 |
| Medical ID                                        | <hr/>                         |                                 |
| ID                                                | <hr/>                         |                                 |
| Risk factors                                      |                               |                                 |
| Memory decline (subjects)                         | <input type="checkbox"/> YES  | <input type="checkbox"/> NO     |
| Memory decline (informants)                       | <input type="checkbox"/> YES  | <input type="checkbox"/> NO     |
| Memory impairment (doctors)                       | <input type="checkbox"/> YES  | <input type="checkbox"/> NO     |
| Age                                               | <hr/>                         |                                 |
| Gender                                            | <input type="checkbox"/> Male | <input type="checkbox"/> Female |
| BMI (kg/m <sup>2</sup> )                          | <hr/>                         |                                 |
| Education                                         | <hr/> year                    |                                 |
| Diabetes                                          | <input type="checkbox"/> YES  | <input type="checkbox"/> NO     |
| Hypertension                                      | <input type="checkbox"/> YES  | <input type="checkbox"/> NO     |
| Hyperlipidemia                                    | <input type="checkbox"/> YES  | <input type="checkbox"/> NO     |
| Head trauma accompanied by consciousness change   | <input type="checkbox"/> YES  | <input type="checkbox"/> NO     |
| Needing assistance to manage money or medications | <input type="checkbox"/> YES  | <input type="checkbox"/> NO     |

|                                                                                                           |                              |                             |
|-----------------------------------------------------------------------------------------------------------|------------------------------|-----------------------------|
| Depression (Depressed mood or a loss of interest or pleasure in daily activities for more than two weeks) | <input type="checkbox"/> YES | <input type="checkbox"/> NO |
|-----------------------------------------------------------------------------------------------------------|------------------------------|-----------------------------|

TDS “Brain Health Test”: Cognitive Test

| Items                                                                                               | Scores   |
|-----------------------------------------------------------------------------------------------------|----------|
| Orientation to time (“What is the year? Month? Date? Day?”)                                         | ____ / 4 |
| Immediate recall of five items                                                                      | ____ / 5 |
| Categorical verbal fluency test<br><br>Saying as many four-legged animals in one minute as possible |          |
| Delayed recall of five items                                                                        | ____ / 5 |
| Clock Drawing Test (10:10)                                                                          |          |
| Total Score                                                                                         | ____     |
